# Supplementary material for: Randomised controlled trial of a just-in-time adaptive intervention (JITAI) smoking cessation smartphone app: the Quit Sense feasibility trial protocol
Source: PubMed Central journal article supplement (PMC8076923; doi:10.1136/bmjopen-2020-048204), 2021-04-26
Supplement: bmjopen-2020-048204supp001.pdf [file bmjopen-2020-048204supp001.pdf]

## Supplementary File

### Protocol amendments.

Minor, non-notifiable, August 2020.

Minor, non-notifiable, December 2020.

Amendments to the Protocol and other documents (e.g. changes to eligibility criteria, outcomes, sample size calculations, analyses) will be agreed by the Trial Management Group (TMG). Such amendments will be forwarded to the Sponsor for confirmation as to whether it is either substantial or non-substantial and will then be submitted to the Ethics Committee for categorisation and approval prior to implementation.

### Indemnity

University of East Anglia insurance shall apply.

### Ancillary and post-trial care

The end of the trial is defined as 6 months following the last follow-up of the last participant randomised, to allow for data entry and data cleaning activities to be completed.

Once participants' involvement in the study has ended, they will no longer receive communications from the study team other than a copy of the findings, if they have requested one. Participants will be sent an SMS to inform them that their participation in the study has ended.

The NHS SmokeFree website support will continue be available after this study ends. Participants in the app group will still be able to access and use the Quit Sense app on their mobile if they wish to do so. If participants continue to use the app, it will continue to collect research data that we may use as part of the study analyses. After the study ends Quit Sense will no longer have technical support and participants will not be able to update or reinstall it. If participants wish, they can uninstall the app following the usual process for removing apps from their phone.

## Data

### Monitoring and management

The Chief Investigator has overall responsibility and will oversee study management. The Trial Management Group will be responsible for the running of the trial and will be supported by the Trial Steering Committee. A separate Data Monitoring and Ethics Committee is not considered necessary because the study is deemed to be low risk to participants.

Study data are collected and managed using REDcap (Research Electronic Data Capture). Data provided by trial participants will be entered under the participants PID number onto the central database stored on the servers based at the Norwich Clinical Trials Unit (NCTU). Access to the database will be via unique, individually assigned (i.e. not generic) usernames and passwords, and only accessible to members of the Quit Sense trial team and external regulators if requested. The servers are protected by firewalls and are patched and maintained according to best practice. The physical location of the servers is protected physically and environmentally in accordance with University of East Anglia's General Information Security Policy 3 (GISP3: Physical and environmental security).

The database and associated code have been developed by NCTU Data Management in conjunction with the Quit Sense trial team. The database software provides several features to help maintain data quality, including; maintaining an audit trail, allowing custom validations on all data, allowing users to raise data query requests, and search facilities to identify validation failure/ missing data. After completion of the trial the database will be retained on the servers of NCTU for on-going analysis of secondary outcomes.

Any transcriptions from the telephone interviews or app collected qualitative data will be anonymised. Voice recordings from telephone interviews and app recordings will be deleted after transcription, or if not transcribed then after audio coding for analysis.

### Confidentiality and access to data

The investigators agree to archive and/or arrange for secure storage of Quit Sense trial materials and records for 20 years after the close of the trial unless otherwise advised by the NCTU. Personal contact details such as names, addresses and phone numbers will be destroyed 12 months after the end of the trial. Requests for access to trial data will be

considered, and approved in writing where appropriate, after formal application to the TMG or Trial Steering Committee (TSC). Considerations for approving access are documented in the TMG and TSC Terms of Reference. Location data will be kept for 20 years before being destroyed. This data will not be made available as an open data set outside of Quit Sense collaborations.

### Concomitant Care

All participants will have access to treatment as usual for smoking cessation regardless of randomisation into this trial.

### Roles and responsibilities

These membership lists are correct at the time of writing:

#### Protocol contributors

| Name           | Affiliation              | Role                                                      |
|----------------|--------------------------|-----------------------------------------------------------|
| Felix Naughton | UEA                      | Led on protocol development                               |
| Juliet High    | Norwich CTU              | Contributed to regulatory and CTU related content         |
| Aimie Hope     | UEA                      | Contributed to protocol development                       |
| Caitlin Notley | UEA                      | Contributed to the qualitative process evaluation section |
| Lee Shepstone  | Norwich CTU              | Contributed to the statistical analysis section           |
| Garry Barton   | Norwich CTU              | Contributed to the health economics section               |
| Tim Coleman    | University of Nottingham | Detailed comments on draft                                |

#### Role of trial sponsor and funders

| Name             | Affiliation                | Role                                    |
|------------------|----------------------------|-----------------------------------------|
| Helen Sutherland | South Norfolk CCG ('Host') | Representative of the host organisation |
| Graham Horne     | UEA ('Sponsor')            | Representative of the sponsor           |
| Sheila Turner    | NIHR                       | Representative of the funder            |

**Trial Team**

| <b>Name</b>    | <b>Affiliation</b>      | <b>Role and responsibilities</b>                     |
|----------------|-------------------------|------------------------------------------------------|
| Felix Naughton | UEA                     | Chief investigator                                   |
| Juliet High    | Norwich CTU             | Coordination of CTU contribution to project          |
| Aimie Hope     | UEA                     | Senior Research Associate; supporting trial delivery |
| Chloe Brown    | University of Cambridge | Computer scientist leading app optimisation          |
| Claire West    | Norwich CTU             | Development of study database and web-platform       |

**Trial Management Group**

| <b>Name</b>     | <b>Affiliation</b>      | <b>Role and responsibilities</b>                     |
|-----------------|-------------------------|------------------------------------------------------|
| Felix Naughton  | UEA                     | Chief investigator                                   |
| Juliet High     | Norwich CTU             | Coordination of CTU contribution to project          |
| Aimie Hope      | UEA                     | Senior Research Associate; supporting trial delivery |
| Tim Coleman     | UEA                     | Co-applicant; mentoring support for CI               |
| Caitlin Notley  | UEA                     | Co-applicant; qualitative process evaluation advisor |
| Garry Barton    | Norwich CTU             | Co-applicant; health economics oversight             |
| Chloe Brown     | University of Cambridge | Computer scientist leading app optimisation          |
| Ann Marie Swart | Norwich CTU             | CTU oversight                                        |
| Claire West     | Norwich CTU             | Development of study database and web-platform       |
| Graham Horne    | UEA                     | Representative of trial sponsor                      |

**Trial Steering Committee**

| <b>Name</b>       | <b>Affiliation</b>                | <b>Role and responsibilities</b>                 |
|-------------------|-----------------------------------|--------------------------------------------------|
| Michael Ussher    | St Georges/University of Stirling | Independent chair (clinical/behavioural science) |
| Aleksandra Herbec | UCL                               | Independent member (behavioural science)         |

|                  |                          |                                               |
|------------------|--------------------------|-----------------------------------------------|
| Simon Coulton    | University of Kent       | Independent member (statistics/HE)            |
| Qasim Chowdary   | Public Health<br>England | Independent member (services/clinical/policy) |
| Jo Hardy         | PPI                      | Independent member (PPI)                      |
| Felix Naughton   | UEA                      | Non-independent member (voting)               |
| Juliet High      | Norwich CTU              | Observer                                      |
| Helen Sutherland | South Norfolk<br>CCG     | Observer (host organisation)                  |
| Graham Horne     | UEA                      | Observer (sponsor)                            |
| Aimie Hope       | UEA                      | Observer                                      |
